# Supplementary material
Source: publisher figshare collection journal article supplement (https://sage.figshare.com/ndownloader/files/11587904)
Supplement: Supplementary file 1 [file 11587904]

## Peer Video Modeling Teacher Fidelity Measure

**Directions:** Follow the steps outlined below.

- Circle “Y” if the teacher performed the listed step.
- Circle “N” if the opportunity to perform that step occurred but the teacher did not perform the listed step.
- Circle “N/A” if the opportunity to perform that step did not occur.

| Procedural Question                                                                                                                                                                                            | Performed? |   |     |
|----------------------------------------------------------------------------------------------------------------------------------------------------------------------------------------------------------------|------------|---|-----|
|                                                                                                                                                                                                                | Y          | N | N/A |
| 1. Was a peer brought to an adjacent room prior to the delivery of the intervention?                                                                                                                           | Y          | N | N/A |
| 2. Was the participant brought to an adjacent room at the start of the intervention?                                                                                                                           | Y          | N | N/A |
| 3. Did the teacher use the iPad to play the videos?                                                                                                                                                            | Y          | N | N/A |
| 4. Before playing the video did the teacher point to the iPad screen and tell the participant to, “[Name of participant] watch this” (or something similar to that)?                                           | Y          | N | N/A |
| 5. Did the teacher redirect the participant back to the video clip if the participant was not paying attention?                                                                                                | Y          | N | N/A |
| 6. Did the participant watch the video for a total of one-third the duration of the entire video (e.g., at least 40 seconds for a video that is 120 seconds in duration).                                      | Y          | N | N/A |
| 7. After the video ended did the teacher use constant time delay (i.e., either zero seconds or five seconds).                                                                                                  | Y          | N | N/A |
| 8. Did the teacher deliver verbal praise if the participant imitated the behavior, “Good job [Name of participant]” (or something similar)?                                                                    | Y          | N | N/A |
| 9. If the participant did not imitate the behavior did the teacher interrupt the incorrect behavior by saying, “Sorry [Name of participant] that is not right” (or something similar to that)?                 | Y          | N | N/A |
| 10. If the participant did not imitate the behavior did the teacher implement the prescribed least-to-most intrusive prompt hierarchy in appropriate order?<br>a. Teacher plays video again. (least intrusive) | Y          | N | N/A |

|                                                                                                                                                                                                                                               |   |   |     |
|-----------------------------------------------------------------------------------------------------------------------------------------------------------------------------------------------------------------------------------------------|---|---|-----|
| b. Teacher plays video again and provides verbal/gestural prompt.<br>c. Teacher plays video again and either provides full physical assistance or performs the behavior for the participant (whichever is most appropriate). (most intrusive) |   |   |     |
| 11. Did the peer perform his/her step in appropriate fashion?<br>a. Step #5: Peer responds to participant initiation.                                                                                                                         | Y | N | N/A |
| 12. Was the participant given the opportunity to proceed through the entire eight-step task analysis?                                                                                                                                         | Y | N | N/A |
| 13. Did the teacher let the participant watch his/her video of choice on the iPad after completing the task analysis?                                                                                                                         | Y | N | N/A |
| 14. Did the entire session last less than 15 minutes?                                                                                                                                                                                         | Y | N | N/A |
| 15. Did the teacher bring the participant and the peer back to the regular classroom after the intervention was over?                                                                                                                         | Y | N | N/A |

*Note.* Procedural fidelity checklist adapted from Van Norman (2005).
